# Supplementary material for: Nickel and cobalt nanoparticles modified hollow mesoporous carbon microsphere catalysts for efficient catalytic reduction of widely used dyes
Source: Royal Society of Chemistry journal article supplement (doi:10.1039/c6ra22498a), 2016-01-01
Supplement: c6ra22498a1.pdf [file c6ra22498a1.pdf]

**Nickel and Cobalt nanoparticles modified hollow mesoporous carbon microspheres catalysts for efficiently catalytic reduction of widely used dyes**

***Meng Tian, Chunxu Dong, Xueliang Cui, Zhengping Dong\****

*College of Chemistry and Chemical Engineering, Gansu Provincial Engineering Laboratory for Chemical Catalysis, Zhongwei High Technology Research Institute, Lanzhou University, Lanzhou 730000, PR China.*

E-mail: dongzhp@lzu.edu.cn; Fax: +86 0931 8912582; Tel: +86 0931 8912577.

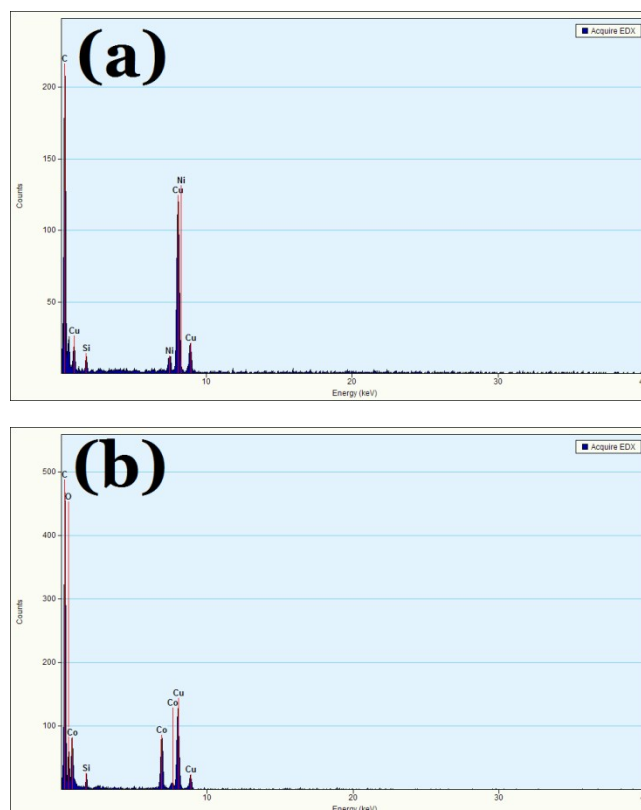

**Fig. S1.** The EDS spectra of the Ni/h-MCM and Co/h-MCM nanocatalysts.

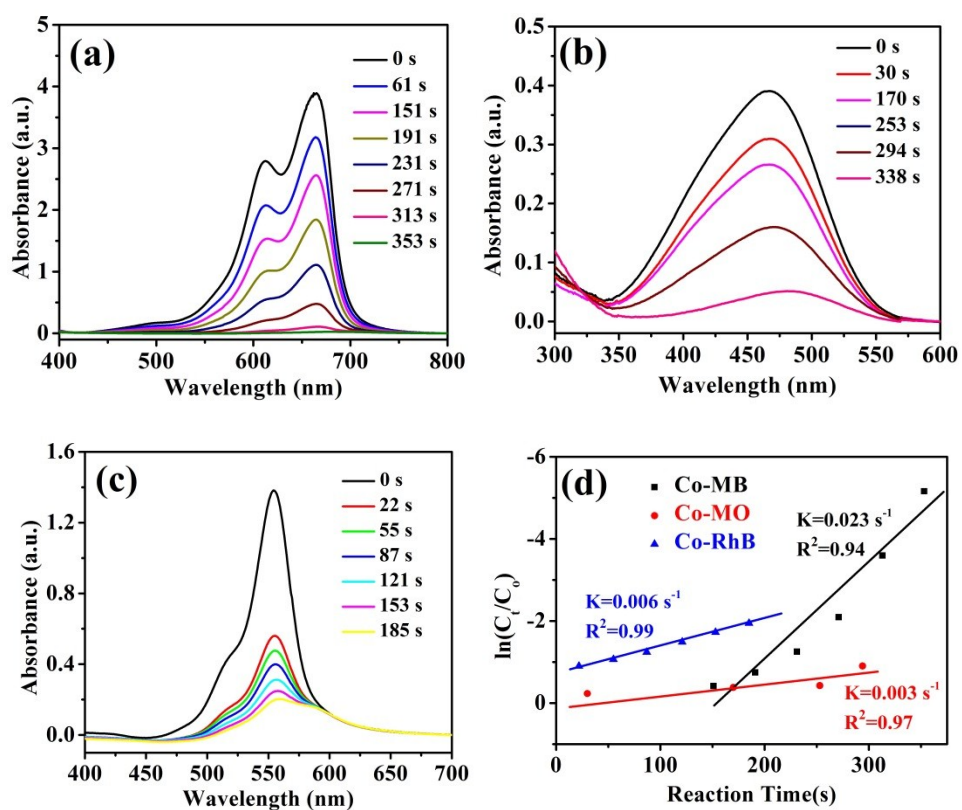

**Fig. S2.** Successive UV-vis spectra for the reduction of MB (a), MO (b) and RhB (c) by NaBH<sub>4</sub> with Co/h-MCM nanocatalyst. (d) Kinetic curve for the reduction of MB, MO and RhB catalyzed by Co/h-MCM nanocatalyst.

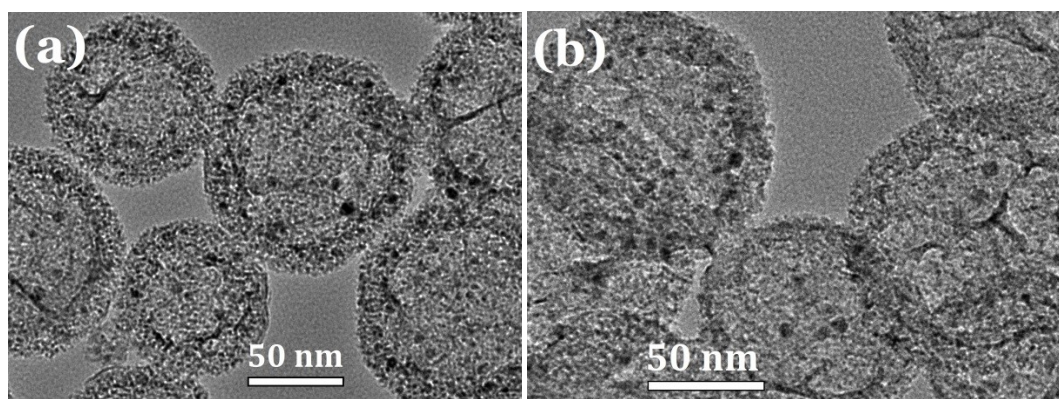

**Fig. S3.** The TEM images of the reused Ni/h-MCM (a) and Co/h-MCM (b) nanocatalysts.
